# Supplementary material for: SHYCD induces APE1/Ref-1 subcellular localization to regulate the p53-apoptosis signaling pathway in the prevention and treatment of acute on chronic liver failure
Source: PubMed Central journal article supplement (PMC5689573; doi:10.18632/oncotarget.19891), 2017-08-04
Supplement: oncotarget-08-84782-s001.pdf [file oncotarget-08-84782-s001.pdf]

# SHYCD induces APE1/Ref-1 subcellular localization to regulate the p53-apoptosis signaling pathway in the prevention and treatment of acute on chronic liver failure

## SUPPLEMENTARY MATERIALS

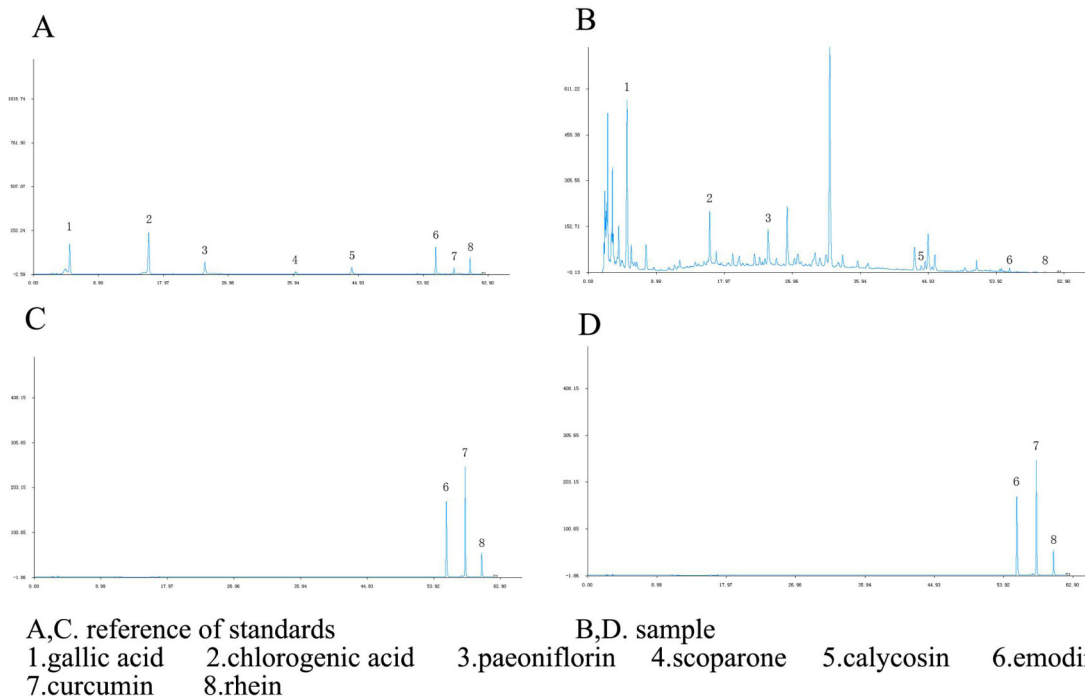

**Supplementary Figure 1: chromatograms of reference of standards, sample at 280, 430nm, respectively. A, C:reference of standards B, D:sample. 1.gallic acid ; 2.chlorogenic acid; 3.paeoniflorin 4.scoparone; 5.calycosin; 6.emodin; 7.curcumin 8.rhein**
